1 **Title:** Probing compression versus stretch activated recruitment of cortical actin and  
2 apical junction proteins using mechanical stimulations of suspended doublets.

3

4

5 Xumei Gao<sup>1</sup>, Bipul R. Acharya<sup>4</sup>, Wilfried Claude Otto Engl<sup>1</sup>, Richard De Mets<sup>1</sup>, Jean  
6 Paul Thiery<sup>3</sup>, Alpha S. Yap<sup>4</sup>, Virgile Viasnoff<sup>1, 2, 3, 5, 6</sup>

7

8 <sup>1</sup> Mechanobiology Institute, Singapore, Level 5, T-Lab Building, 5A Engineering Drive  
9 1, Singapore, 117411

10 <sup>2</sup> Department of Biological Sciences, National University of Singapore, 14 Science  
11 Drive 4, Singapore, 117543

12 <sup>3</sup> Institute of Molecular and Cell Biology, 61 Biopolis Drive, Proteos building,  
13 Singapore, 138673

14 <sup>4</sup> Division of Cell Biology and Molecular Medicine, Institute for Molecular Bioscience,  
15 The University of Queensland, St. Lucia, Queensland, Australia, 4072

16 <sup>5</sup> CNRS UMI3639, Level 5, T-Lab Building, 5A Engineering Drive 1, Singapore, 117411

17 <sup>6</sup> To whom correspondence should be addressed

18 **ABSTRACT:**

19

20 We report an experimental approach to study the mechanosensitivity of cell-  
21 cell contact upon mechanical stimulation in suspended cell-doublets. The doublet is  
22 placed astride an hourglass aperture, and a hydrodynamic force is selectively  
23 exerted on only one of the cells. The geometry of the device concentrates the  
24 mechanical shear over the junction area. Together with mechanical shear, the  
25 system also allows confocal quantitative live imaging of the recruitment of junction  
26 proteins (e.g. E-cadherin, ZO-1, Occludin and actin). We observed the time sequence  
27 over which proteins were recruited to the stretched region of the contact. The  
28 compressed side of the contact showed no response. We demonstrated how this  
29 mechanism polarizes the stress-induced recruitment of junctional components  
30 within one single junction. Finally, we demonstrated that stabilizing the actin cortex  
31 dynamics abolishes the mechanosensitive response of the junction. Our  
32 experimental design provides an original approach to study the role of mechanical  
33 force at a cell-cell contact with unprecedented control over stress application and  
34 quantitative optical analysis.

35 **INTRODUCTION:**

36

37 The ability of cells to perceive the biophysical properties of their environment is  
38 reliant on the mechanosensitivity of their adhesion sites. Particular focus has been  
39 placed on adhesions interacting with the extracellular matrix, such as focal  
40 adhesions <sup>1</sup>. Our understanding of the molecular mechanisms and downstream  
41 consequences of such mechanosensation has been largely enabled by the  
42 development of simplified *in vitro* systems <sup>2</sup>. Molecular imaging, force  
43 measurements, and the mechanical stretching of substrates coated with ECM, have  
44 enabled the molecular mechanisms <sup>3</sup>, and their downstream consequences, to be  
45 determined. This is particularly relevant in terms of understanding how  
46 mechanosensing influences cell lineage commitment and development <sup>4</sup>.

47 However, our understanding of mechanosensation at cell-cell contacts lags  
48 behind. This is partly due to the complexity in mimicking, controlling, and  
49 quantitatively imaging of cell-cell contacts with sufficient precision. The  
50 reconstitution of cadherin-based adhesions on deformable surfaces (such as pillars <sup>5</sup>)  
51 or on magnetic beads (magneto-cytometry <sup>6</sup>) has been instrumental in unraveling  
52 the mechanosensitive recruitment of E-cadherin under mechanical stimuli.  
53 Furthermore, the application of external mechanical stresses over cell junctions was  
54 achieved by stretching cell monolayers. Substrate surface patterning has also been  
55 incorporated to enable the formation of stereotypical doublets for which the  
56 intercellular tension was controlled <sup>7,8</sup>. In this case the mechanical stress is  
57 transmitted from the substrate, through focal adhesions and the cytoskeleton, to the  
58 cell-cell contact. Hence, a full mechanical stimulation of the cell body results.  
59 Alternative approaches using a laser/magnetic tweezer to internally stretch the

60 junction have also been documented<sup>9</sup>. Here, a small force (on the order of 100 pN)  
61 can be applied. Another popular method to study cell-cell adhesion strength is to use  
62 AFM tips and dual pipette assays on suspended cell doublets<sup>10,11</sup>. Measurement of  
63 the force required to separate the contact provides an estimate for its stability<sup>12,13</sup>.  
64 In these last cases, the force measurement scheme impinges live quantitative  
65 imaging of the proteins at the junction.

66 In this work, we present a custom device that simultaneously allows the  
67 precise application of a mechanical stimuli on a single cell-cell contact between two  
68 suspended cells, with high resolution quantitative imaging of the contact response. It  
69 is inspired from magneto-cytometry where a coated magnetic micro-bead is placed  
70 in contact with a cell and wobbled by a rotating magnetic field. In our case we  
71 replaced the magnetic bead with a real cell, to create a *bona fide* cell-cell interaction.  
72 An antifouling hourglass-shaped through-hole holds the doublet in place. To allow  
73 fast confocal imaging, an oscillatory transverse flow stimulates the contact while it is  
74 maintained in the horizontal position. We analyze the spatial distribution of actin, E-  
75 cadherin, ZO-1 and Occludin during their recruitment, upon mechanical stimulation.

76

77

78 **RESULTS:**

79 **Design and Microfabrication of the Single Cell-cell Junction Stimulator.**

80 Figure 1a describes the general arrangement of the microfabricated device  
81 used to apply shear stress to the cell-cell junctions of the doublet. We used standard  
82 lithography and UV curable polymer replica techniques (detailed in the Method  
83 section) to fabricate a horizontal channel connected vertically to an open upper  
84 compartment by a single through-hole. The profile of the through-hole was  
85 specifically designed to have a smooth curved bowl-shape interior (Figure 1b,  
86 Supplementary Figure 1a). Applying a negative vertical pressure pulse, we  
87 subsequently placed individual pre-formed cell doublets inside the device so that  
88 one cell was on each side of the aperture. The curved geometry guided the  
89 positioning of the cell-cell contact region to the narrowest region of the through-  
90 hole opening (the aperture). It also maintained a grip around the junction during the  
91 shearing stimulation, while minimizing undesirable stress over the rest of the cell  
92 bodies (Figure 1c).

93 We tailored the dimensions of the through-hole aperture to match the  
94 average cell junction size. To change the aperture diameter, we pressed the PDMS  
95 mold with dome-shaped pillars (Details for fabrication can be found in Method  
96 section) onto a flat PDMS substrate. This allowed us to retain the proper curved  
97 profile. We then cast a negative replica of the gap region between the two PDMS  
98 layers by capillary filling with a UV adhesive (NOA73). The size of the Hertz contact  
99 between the dome and the substrate sets the size of the opening. The pressing  
100 process is controlled by a custom-made tuneable spring-loaded press mounted on a  
101 20X microscope. The method yields through-holes ranging from  $\varnothing 5\mu\text{m}$  to  $\varnothing 22\mu\text{m}$

102 with 1  $\mu\text{m}$  increments (Figure 2). In this study, we repeatedly produced holes of  
103  $\varnothing 10\mu\text{m}$  to match the average junction size of the S180 cell doublets.

104 We preformed cell doublets in an external chamber comprising an array of  
105  $\varnothing 50\mu\text{m}$  round pits cast in agarose gel (Supplementary Figure 1b). The size of each  
106 antifouling pit was designed to accommodate only 2 cells. After mature contacts  
107 formed (4-6 hours), we transferred the doublets at low density ( $1 \times 10^4/\text{ml}$ ) into the  
108 upper compartment of the stretching device. A custom LabVIEW program interfaces  
109 our channel to a Fluigent® system (MFCS) to apply high-precision pressure gradients  
110 across the connecting through-hole and/or between the lower channel  
111 inlets/outlets.

112 First, a vertical pressure gradient drove cells across the aperture.  
113 (Supplementary video 1). Proper calibration of the aperture size ensures the  
114 doublets self-position so that one cell is on either side of the aperture  
115 (Supplementary Figure 2a-c). The process was monitored by bright field imaging and  
116 the vertical pressure gradient was stopped upon stabilisation of the doublet  
117 position.

118

### 119 **Localized Mechanical Stress Application at Single Cell-cell Junction.**

120 We then imposed a lateral oscillatory flow in the channel to stimulate the  
121 junction. While the top cell was kept still and protected from the flow by the dome-  
122 shaped through-hole, the bottom cell experienced a mechanical shear stress. We  
123 used finite element modeling (FEMLab) to estimate the amplitude and distribution  
124 of the mechanical stress at the junction (Figure 3a, Supplementary Figure 3). The  
125 simulation showed that most of the stress concentrated along the junction edge.  
126 (Figure 3b, c). Hence, we selected a shear flow in the range of  $100\text{-}300\text{nN}/\mu\text{m}^2$ , which

127 resulted in a peak stress profile along the junction edge, and was comparable to the  
128 physiological amount of force exerted at cell-cell contacts by actomyosin contraction  
129 <sup>13,14</sup>. A steady shear resulted in a progressive deformation of the doublet across the  
130 aperture and proved unsuitable for observation and quantification. To alleviate the  
131 deformation of the junction, we used oscillatory stimulations instead. The flow  
132 induced motion of the lower cell lead to the oscillatory shear of the junction with  
133 minimal (though sizeable) tilt of the doublet due to the matching of the size of the  
134 aperture with the size of the junction. We set the stimuli frequency to at 1Hz with  
135 fixed strain amplitude. The chosen frequency was about a decade faster than the  
136 characteristic relaxation time of the cell cytoskeleton ( $\sim 10$  s). At this frequency the  
137 cell reacts elastically (minimal mechanical yield) with a maximized cumulative  
138 response of protein recruitment. The system was then mounted on a Nikon inverted  
139 microscope (Eclipse) and we imaged the cells at high resolution using a spinning disk  
140 (Yokogawa 60x).

141 We then quantified the *en face* images of the junction to establish the  
142 redistribution of proteins during their recruitment, as induced by the mechanical  
143 stimuli (Figure 4). To this end, we compared the junction states in their resting  
144 configuration, before and immediately after stimulation. This scheme avoided  
145 ambiguous imaging artifacts resulting from the geometric distortion of the junction  
146 under shear stress. The coarse grained response of the junction can be assessed by  
147 subtracting the recruitment of junctional proteins before and after stimulation  
148 without further registration (Figure 4). However we also implemented a more local  
149 evaluation of the protein recruitment in the following way. Suspended cells, and  
150 S180 (stably expressing E-cadherin-GFP) in particular, concentrate their cadherin into  
151 a ring of  $\sim 0.8$   $\mu\text{m}$  clusters along the edge of the cell-cell contact. The central area of

152 the contact, on the other hand, is largely depleted from adhesion proteins as well as  
153 cytoskeletal components <sup>11,15</sup>. We harnessed this stereotypical clustered-  
154 organization of junctional E-cadherin so that individual clusters served as fiducial  
155 points from which junction regions could be traced and correlated before and after  
156 the stimulation. Using a custom MatLab code that registered the locations of  
157 individual cadherin clusters (Supplementary Figure 4), we estimated the local  
158 recruitment of the protein at each location by quantitating changes in the total  
159 fluorescence in a 1 $\mu$ m x 1 $\mu$ m x 1 $\mu$ m voxel centered over each cluster. Mapping the  
160 specific changes in protein recruitment under or in between each cluster *i*- avoided  
161 measurement artifact due to small rotation or deformation of the junction during  
162 the mechanical stimulation *ii*- allowed to directly compare the recruitment of protein  
163 under cadherin rich and cadherin poor regions along the junction. We transfected  
164 the cell doublets with a second protein of interest labeled with m-Apple. We used  
165 the same voxel centered on the cadherin cluster to assess simultaneously the local  
166 concomitant recruitment of cadherin with this other proteins.

167 To compare the effect of compression versus stretch, we stimulated the  
168 junction asymmetrically (1-sided only) by applying a left sided oscillatory pressure  
169 gradient along the channel (Figure 5a). It resulted in a mesoscopic compression of  
170 the junction on the left-hand side and in a mesoscopic stretch on the right-hand side.  
171 Both stresses have the same amplitude (Figure 3c) and are applied simultaneously  
172 on the same junction. It resulted in a very unbiased way of measuring the  
173 differences in response between each type of stimulation.

174

175

176



## 177 **Stress-induced Actin Recruitment at Junctions.**

178 We used suspended doublets of S180, a mouse sarcoma cell line in which  
179 none of the cadherins (E, N, P, C) are endogenously expressed yet a stable  
180 transfection of E-cad-GFP restores the adhesive phenotype<sup>13,15,16</sup>. This cell model  
181 was established for the measurement of adhesion forces, and the study of E-  
182 cadherin mechanosensitivity<sup>13</sup>. Adherens junctions have proven sensitive to  
183 mechanical stress, with alpha-catenin<sup>17</sup>, vinculin<sup>18</sup> and N-Wasp<sup>19</sup> shown to be  
184 involved in the reinforcement of junctional actin upon the stretching of cryptic sites.  
185 In the present system, we first characterized the response of F-actin (actin-mApple)  
186 to mechanical stimulation of the junction at the cell-cell contact.

187 Figure 5a shows that a one-sided stimulation led to a clear reinforcement of  
188 actin along the stretched part of the junction, but not along the compressed side. A  
189 sizeable accumulation arose along the stretched area after 1 minute of stimulation,  
190 reached 90% of maximum accumulation after 2 minutes, and approached a plateau  
191 at 10 minutes (Supplementary Figure 5). Mechanical stimulation had no effect on the  
192 cell cortex located a few micron away from the junction at any time point (Figure  
193 5a). The mild decrease in fluorescent signal reflected the bleaching of the mApple  
194 fluorescent tag. As a control for the possible accumulation of membrane folds and  
195 distortions, we quantified the fluorescence intensity of a plasma membrane marker  
196 tagged with mApple. No accumulation of this construct was observed upon  
197 mechanical stimulation, thereby ruling out spurious artifacts of membrane  
198 accumulation and confirming the *bona fide* recruitment of actin.

199 Further quantification of the response of F-actin located beneath individual  
200 E-cadherin clusters (Figure 5c) showed a similar trend (increase of  $26.0 \pm 2.1\%$  s.e.m.,  
201  $n=284$  puncta regions). Taken together, our data demonstrate the stress-activated

202 recruitment of actin occurs solely at the stretched part of the junction leaving the  
203 compressed part unperturbed. We further evaluated if the mechanically polarized  
204 recruitment of actin correlated with an enhanced recruitment of the apical junction  
205 proteins E-cadherin, ZO1 and Occludin.

206

207

### 208 **Stress-induced Junctional Recruitment of E-cadherin, ZO-1, and Occludin.**

209 We thus characterized the responses of E-cadherin, ZO-1 and Occludin at the  
210 cell contact under identical mechanical stimulation. S180 cells were labelled with ZO-  
211 1-mApple or Occludin-mApple in addition to E-cadherin-GFP.

212 The recruitment of E-cadherin followed the same dynamics as actin (Supplementary  
213 Figure 5b) and there was no delay between their recruitment. In contrast, we did not  
214 detect any significant junctional recruitment of ZO-1 or Occludin after 2 min of  
215 stimulation. However, as Figure 6a shows, a 10-minute stimulation led to the  
216 recruitment of both junction proteins on the same contact side, and within the same  
217 time scale, as previously observed for actin. The intensities of E-cadherin, ZO-1, and  
218 Occludin increased selectively at the stretched junction region by  $34.3 \pm 4.0\%$ s.e.m.  
219 ( $n=226$  puncta),  $14.6 \pm 3.9\%$ s.e.m. ( $n=60$  puncta), and  $28.5 \pm 3.4\%$ s.e.m. ( $n=141$   
220 puncta) respectively compared to control conditions, and we could not detect any  
221 increase on the rest of the cortex (Figure 6b, Supplementary Figure 6). This result  
222 demonstrates that an externally applied mechanical stress was able to reinforce the  
223 localization of junction proteins, i.e. E-cadherin, ZO-1, and Occludin, to the vicinity of  
224 the cell-cell contact.

225 Mechanosensing across cadherins and ZO1 have been reported to induce  
226 actin accumulation and junction reinforcement. However the mechanism by which

227 Cadherin and ZO1 recruitment is in turn enhanced at junction under stress is far less  
228 understood. In the present context, the short time scale of the responses ruled out  
229 the involvement of any transcriptional mechanism. We tested the hypothesis that it  
230 is indeed the recruitment of actin that is responsible for the subsequent recruitment  
231 of the apical junction proteins. We inhibited the stress-induced recruitment of actin  
232 at the contact, without altering the junction proteins themselves treating the cells  
233 with Jasplakinolide (100nM,  $IC_{50}=2\mu\text{M}$ , 60min<sup>20</sup>). As we previously reported, such  
234 treatment leads to a general reinforcement of cortical and junctional actin<sup>15</sup> without  
235 affecting the junction integrity. However, in this case the drug fully inhibited the  
236 mechanosensitive response by abolishing all reinforcement of the junctional actin  
237 under mechanical stimulation (Figure 5c). Similarly, in absence of any mechanical  
238 stimulation, we observed a global increase in E-cadherin ( $47\pm 3\%$ s.e.m., n=20  
239 junctions), ZO-1 ( $42\pm 2\%$ s.e.m., n=8 junctions), and Occludin ( $22\pm 2\%$ s.e.m., n= 11  
240 junctions) along the entire junction (Supplementary Figure 7) upon addition of the  
241 drug. However, although the baseline levels of these proteins at the junction were  
242 enhanced (but not saturated), we did not observe any additional recruitment of  
243 junction proteins after mechanical stimulation of Jasplakinolide treated doublets  
244 (Figure 6a-b). It therefore strengthened the idea that accumulation of junction  
245 complexes under mechanical stress was governed by a local regulation of actin  
246 cortex dynamics. This suggests that the reinforcement of the actin cortex is a key  
247 step in the mechanically induced recruitment of junctional proteins that possess  
248 actin binding sites. To support this conclusion, we noticed that the recruitment of  
249 junctional actin, ZO-1 and occludin is relatively homogeneous along the stretched  
250 side of the junction. We assessed the patterns ZO-1 and occludin recruitment along  
251 the cell contact rim by comparing regions with high levels of E-cadherin (cadherin

252 puncta) versus regions E-cadherin levels (spaces in-between puncta). In selecting the  
253 areas in-between puncta for the analysis, we included only those regions with  $\leq 50\%$   
254 E-cadherin levels compared to that of the puncta regions. Figure 7 shows that F-  
255 actin, ZO-1 and occludin tend to be relatively concentrated at E-cadherin puncta but  
256 not in-between them. Furthermore, the pool of E-cadherin situated between the  
257 puncta showed no observable increase upon mechanical stimulation. The increase in  
258 actin ( $26.5 \pm 4\%$  s.e.m.,  $n=106$  puncta), ZO-1 ( $15 \pm 6\%$  s.e.m.,  $n=49$  puncta) and occludin  
259 ( $26 \pm 5\%$  s.e.m.,  $n=76$  puncta) proved independent of their localization along the rim.  
260 This observation points to the possibility that the mechanosensitive reinforcement  
261 of ZO-1 and occludin proteins is not sensitive to the mechanically induced  
262 recruitment of E-cadherin, but rather is linked to the recruitment of actin. Such a  
263 mechanism would ensure reinforcement of the junction, independently of E-  
264 cadherin mechanosensitivity, as long as actin is recruited. One could argue that them  
265 partial rescue of Apical junction proteins at the contact by mechanical stress is an  
266 artifact of the “unusual” nature of the cellular contact we study here. Indeed S180  
267 cell do not normally polarize. To strengthen our conclusions that actin dynamic  
268 recruitment is essential to the subsequent enhancement of apical junction proteins  
269 independently of the sensing mechanism we obtained similar results in mature  
270 junctions formed in monolayers of CaCo cells. The results are presented in  
271 Supplementary materials.

## 272 **DISCUSSION:**

273 The technological approach we presented here presents some advantages  
274 and some drawback compared to the conventional substrate stretching. On one  
275 hand it confers superior analysis capabilities due to the formation of stereotypical  
276 junctions. In conventional substrate stretching for plated cells, such as the equiaxial

277 stretching used in this study, actin belts are easily disrupted and physically torn apart  
278 during the procedure, especially when cells have been treated with Jaspakinolide  
279 (Supplementary Figure 9). The resulting diffuse actin meshwork at the junctions  
280 imposes a technical inconvenience for subsequent analytical quantification.  
281 Furthermore, the orientations of junctions in cells plated on substrates are usually  
282 stochastic, leading to stress heterogeneity. Oppositely, in the single junction  
283 stimulator, as the stress is customized for individual junctions, the junction  
284 disruption is minimized. All junction stimulations are aligned and calibrated along  
285 the flow, therefore the junction stress is applied in a controlled manner. When the  
286 stimulation is directional, i.e. single-sided, opposite sides of the junction are stressed  
287 differently. This enables us to study the effects of stretching and compression  
288 simultaneously on the same junction, with side providing an internal comparison to  
289 the other. Because cell doublets under stimulation are all in suspended  
290 configuration, there is no cell-substrate interaction. As a result, the single junction  
291 stimulator system while imposing localized stress at the junction, eliminates any  
292 confounding effect induced through the cell-matrix/substrate interface. On the other  
293 hand the system requires that cell survive as suspended doublets that is not the case  
294 for every cell lines (especially epithelial ones).

295 We also demonstrated that the mechanical stimulation of S180 cells with our  
296 system presents striking similarities with the mechanical stimulation of bona fide  
297 epithelial junctions. In particular our system demonstrate that role that mechanical  
298 stimulation can play in recruiting and structuring apical junctions. We previously  
299 reported the mechanosensitive recruitment of E-cadherin and actin in S180. We  
300 demonstrated that E-cadherin enrichment at junctions stems from the reduction of  
301 its turnover dynamics due to the stabilization of the cortex<sup>15</sup>. In this case the E-

302 cadherin turnover rate was related to an enhanced binding time of E-cadherin to the  
303 slower actin cortex. In this context we apply an external load that differs in nature  
304 with local contractions. Based on previous reports, the stress induced recruitment of  
305 actin and E-cadherin at junctions under an external mechanical load was expected,  
306 as previous reports had described the reinforcement of adherens junctions under  
307 local mechanical stress. In these cases the local stress was generated by actomyosin  
308 contractility<sup>21</sup> or an external mechanical load<sup>7,17</sup>. Previous report focused on the  
309 role of cadherin as mechanosensors that lead to the downstream recruitment of  
310 actin. Recently ZO1 has also been identified as a mechanosensor<sup>22</sup> independently of  
311 E-cad. Other less characterized mechanisms have also been described, including the  
312 alteration of actin cortex properties under tension<sup>15,21,23</sup>. Nonetheless, these  
313 mechanisms are probably redundant. Collectively, our results suggest that an  
314 external mechanical stretch is able to enhance the recruitment of actin at the  
315 junction independently of any cell-substrate interaction. Compression does not lead  
316 to any significant mechanosensitive accumulation of actin. Even though compression  
317 occurs at the mesoscopic level, it is unlikely that individual junction protein are  
318 actually compressed. It clearly shows that mechanical junctions reacts not only to  
319 the amplitude of the mechanical stimulation but also to its direction. Our results also  
320 suggest that independently of the sensing mechanism the recruitment of actin leads  
321 to the enrichment of the apical junction proteins. The loss of response in  
322 Jaspakinolide treated cells demonstrates that the actin restructuration and dynamics  
323 plays a critical role in this process. This places the reinforcement of the actin cortex  
324 as a key step in the mechanically induced recruitment of junctional proteins  
325 possessing actin binding sites. One could speculate that such a mechanism is a stake  
326 in the localization of apical junction around the apical belt in epithelial cell.

327

328

329

330 **METHODS:**

331 Ethics approval is not required for this study.

332

333 1. Cell Culture & Plasmids

334 S180 murine sarcoma cell line stably expressing human E-cadherin fused with  
335 EGFP was a gift from Dr. Jean Paul Thiery. Caco-2 epithelial wild-type cell line was  
336 from ATCC and grown in RPMI Media. The S180 cells were transfected with  
337 mammalian expressing plasmids (pcDNA3.1, invitrogen™) containing actin, ZO-1 or  
338 occludin constructs infused with mApple. Hygromycin (250µg/ml) was used briefly to  
339 enrich such mApple fluorescent populations. For plasma membrane labelling,  
340 palmitoylation site of neuromodulin (GAP-43) at N-terminal MLCCMRRTK (5' – ATG  
341 CTG TGC TGT ATG AGA AGA ACC AAA CAG GTT GAA AAG AAT GAT GAG GAC CAA  
342 AAG ATC) was infused in front of mApple fluorescent protein to give its PM-targeted  
343 localization. The cells were used 20 to 24 h after transfection. The cells were treated  
344 with Jasplakinolide (100nM, Calbiochem) for 1 hour before stimulation. Cells were  
345 cultured, mechanically stimulated and live-imaged in DMEM with 10% FBS at 37°C  
346 5% CO2 condition.

347

348 2. Single junction stimulation

349 2.1. System fabrication and characterization

350 The single junction stretcher (SJS) was devised for mechanical stimulation  
351 and live-imaging of single cell-cell junction in fluorescently labelled suspended cell

352 doublet. It comprised a micro-channel system made of UV curable polymer (Norland  
353 Optical Adhesive 73) and a microscope mounting adaptor made of poly(methyl-  
354 methacrylate). The micro-channel was structured as two overlaid polymer layers, i.e.  
355 channel wall layer and channel cover layer, on a  $\varnothing$ 20mm glass coverslip (Figure 1a,  
356 Supplementary figure 1a). Their master molds were developed through  
357 photolithography techniques using SU8-3050 and AZ-1350J resists on silicon wafers.  
358 An additional step of thermal softening and rounding (reflow) was performed on the  
359 cover layer mold to generate a desired dome-shape profile for the central pillar  
360 structure that was later used to make the through-hole geometry to accommodate a  
361 single cell junction.

362         Daughter mold for the channel wall was obtained by standard PDMS casting  
363 and curing from the master mold. Channel wall layer was then directly morphed  
364 onto the coverslip using this PDMS daughter mold, giving the channel final geometry  
365 of 50 $\mu$ m in depth and 40 $\mu$ m in width with a round middle-section bulge of  $\varnothing$ 50 $\mu$ m.  
366 For channel cover layer, the daughter mold was obtained by PDMS double casting.  
367 So, it retained the dome-shape pillar structure. When the mold was pressed against  
368 a flat PMDS substrate with tunable spring-loaded pressor, a clear circular contact  
369 surface was formed between the rounded pillar tip and the substrate (Figure 2). This  
370 contact area changes in response to the pressing force applied. For S180 cell  
371 doublets, it was adjusted to be  $\varnothing$ 10-12 $\mu$ m. The gap between the substrate and the  
372 mold was then filled with polymer by capillarity. Because the contact area was  
373 devoid of any polymer, after curing it became the through-hole that cell junction  
374 could rest in.

375         The two channel layers were subsequently overlaid with the cover layer  
376 through-hole aligned on top of the wall layer channel bulge. The compound



377 structure was subjected to another round of curing and finally attached to the  
378 mounting adaptor. After surface passivation with pluronic acid (0.2% w/v), the  
379 system was connected to microfluidic pumps (Fluigent MFCS™-4F) controlled with  
380 custom LabVIEW codes. Flow speed inside the channel was calibrated using  
381 fluorescent beads ( $\varnothing 1\mu\text{m}$ , FluoSphere® ThermoFisher). Epifluorescence microscope  
382 was used with a fixed exposure time of 50ms to capture the travel distances of beads  
383 when the pressure difference between two channel inlets went from 0 to 0.8mBar  
384 (Supplementary figure 2a, b). The beads travel speed, which inferred flow speed,  
385 was computed and plotted as scatter-cloud with correlation to pressure difference  
386 applied.

387 Cell doublets for SJS study were prepared externally (Supplementary figure  
388 1b). S180 cells were trypsinized and loaded into arrays of round-bottom micro-wells  
389 made of hydrogel with  $\varnothing 50\mu\text{m}$  opening and  $30\mu\text{m}$  depth to form doublets. These  
390 dome-shape micro-wells were constructed with PDMS mold made using the same  
391 reflow and casting techniques in channel cover layer fabrication. Because S180 was  
392 usually of  $\varnothing 15\text{-}20\mu\text{m}$  in size in suspension, individual micro-well was most likely to  
393 capture only two cells and bring them into contact. As a result, large quantities of  
394 doublets with mature cell-cell junction could be generated after 4-6 hours of  
395 incubation. The doublets were then harvested and transferred into the SJS system  
396 for stimulation.

397 By regulating the pressure at channel inlets, we could precisely control the  
398 liquid flow both inside SJS channel and across the through-hole. With an inward flux  
399 at the through-hole, doublet of desired geometry could be located and positioned  
400 (Supplementary figure 2c, Supplementary video 1). Oscillatory stimulation of the  
401 junction was induced by sinusoidal alternating flows with a speed of 2-4m/s inside

402 along the channel. Adding a persistent pressure difference between the channel  
403 ends could render the two-sided (symmetrical) stimulation into one-sided  
404 (asymmetrical) (Supplementary video 2). Oscillation frequency was tunable but had  
405 been fixed at 1Hz for all experiments. For each experiment condition, junction  
406 stimulation was repeated on over 10 individual doublets.  
407

## 408 2.2. Junction stress simulation

409 Stress induced by deformation at the cell contact was simulated using  
410 commercial finite element (FE) analysis software COMSOL Multiphysics. The entire  
411 geometry was constructed based on dimensions measured in actual experiment. The  
412 channel had a cross-section of W40xH50 $\mu\text{m}$  and 500 $\mu\text{m}$  in length. The cell inside the  
413 channel was set to 15 $\mu\text{m}$  in diameter and formed a  $\varnothing$ 10 $\mu\text{m}$  contact area with the  
414 channel top. It was modelled as a 0.5 $\mu\text{m}$  thick elastic shell (Young modulus: 2kPa,  
415 Poisson's ratio: 0.4). The liquid velocity field in the channel and the resultant drag  
416 force due to liquid viscosity on the cell surface were simulated for different flow  
417 speeds (Supplementary figure 3). The force experienced by the junction was  
418 decomposed into pulling (or squeezing) force normal to the junction and shearing  
419 force parallel to the junction (Figure 3). The shearing component turned out  
420 significantly smaller in magnitude than the vertical component. While the shearing  
421 force was directly counterbalanced due to the geometric constrain of the channel  
422 through-hole, the pulling and squeezing forces were largely delivered to the cell  
423 junction. The distribution of such pulling and squeezing along the junction ring was  
424 asymmetrical during the stimulation, with one side being pulled to a larger extent  
425 than the other. This was evidenced by the directional deformation of the cell in the  
426 flow. Based on the FE simulation, stimulation schemes for single junction study were

427 adjusted with a flow speed of 2-4m/s for a constant deformation stain, which was  
428 translated into a physiologically relevant force of 100-300nN/ $\mu\text{m}^2$  on the junction.

429

### 430 2.3. Imaging and data analysis

431 For each S180 doublet properly positioned in SJS, a 10-20 $\mu\text{m}$ -thick volume  
432 circumscribing the intercellular region was imaged using spinning disk confocal  
433 microscope with 60X magnification before and after the stimulation. The doublet  
434 adopted the same upright deformation-free configuration in both imaging events.  
435 The image stacks were then processed with custom Matlab codes to re-orientate the  
436 cell contact in a fixed referential. A 1 $\mu\text{m}$  thick volume enclosing the junction was  
437 then isolated and integrated vertically to generate the junction top-view image  
438 (Figure 4). Volumes of the same size but with an offset of 3 $\mu\text{m}$  above and below the  
439 junction region were also analyzed as controls. The intensity change along the  
440 junction ring was determined based on the percentage difference between top-view  
441 images before and after stimulation. Finally, all junction images within each  
442 experiment condition were overlaid and averaged to give a more conclusive  
443 presentation. Likewise, normalized intensity changes along the junction ring were  
444 also averaged.

445 Because of plasma membrane fluidity, molecular patterns along the junction  
446 ring might be occasionally disturbed after the stimulation. To circumvent issues in  
447 junctional pattern-matching during subsequent image quantification, a more  
448 elaborate signal analysis using Matlab was developed. Briefly, characteristic patchy  
449 distribution of E-cadherin puncta at the junction was translated into a circle of  
450 fiducial references, so that junction molecular response could be tracked in a  
451 spatially-aware manner. 3D coordinates denoting the locations of distinct E-cadherin

452 puncta were determined. Then the coordinates of individual punctum before and  
453 after stimulation were paired (Supplementary figure 4). Finally, the florescent  
454 intensities of different labeled molecules within a volume of  $1\mu\text{m}^3$  centered at the  
455 identified coordinates were calculated. Changes of these volume intensities between  
456 the paired locations were plotted for comparison between different experiment  
457 conditions. The same procedures were used to identify regions in between the  
458 cadherin puncta (inter-puncta space).

459

### 460 3. Equiaxial Stretching

#### 461 3.1. Experimental setup

462 Caco-2 cells were cultured to confluence with mature cell-cell junctions on  
463 collagen I coated PDMS-bottom 6-well plate (Flexcell® vacuum-based stretching  
464 system). An equiaxial stretching of 10% constant stain was imposed for 5 min on the  
465 Caco-2 monolayer. Cells were fixed and stained for endogenous E-cadherin (mAb  
466 Rat, clone ECCD- 1, Invitrogen; 191900), F-actin (Phalloidin AlexaFluor647,  
467 Invitrogen), ZO-1 (mAb mouse, Abcam; ab59720) and occludin (mAb Rabbit,  
468 Invitrogen; 6H10L9). Apical junctions of the cells were visualized and imaged by LSM  
469 780 100X confocal microscopy. Imaging for the stretched and the control groups  
470 were conducted simultaneously with 3 independent replicative experiments. All  
471 experiment conditions were kept consistent.

472 E-cadherin knockdown in Caco-2 monolayer was verified by  
473 immunofluorescent staining, with E-cadherin (mAb Rabbit, Cell Signaling),  $\alpha$ -catenin  
474 (mAb mouse, Cell Signaling), and  $\beta$ -catenin (mAb mouse, BD). The lysates were also  
475 immunoblotted for E-cadherin (mAb Rabbit, Cell Signaling) and GAPDH (loading  
476 control; mAb Rabbit, Sigma).

477

478           3.2. Imaging and data analysis

479           Image quantification method used in our equiaxial stretching experiments for  
480 cell-cell junction in monolayer was based on Line-scan analysis. Briefly, volumes in  
481 Caco-2 monolayer containing the tight junction region were imaged using confocal  
482 microscope with 63X magnification. Cell-cell contacts were identified using line-  
483 selection function in ImageJ. A line of 10 $\mu$ m long and 1 $\mu$ m thick was positioned  
484 orthogonal to, and centered on, each cell-cell contact according to the ZO-1 or  
485 occludin signal in every image. Measurements for the actin, E-cadherin, ZO-1 and  
486 occludin fluorescence intensity profiles along these lines were obtained using  
487 custom Matlab code based on ImageJ linescan function that averages the pixel  
488 intensity value along the line. A Gaussian curve centered at zero is generated from  
489 such intensity profile with its peak reflecting the junctional fluorescence signal for  
490 each profile. The center peak intensities were adjusted for background by  
491 subtracting the minimum value lying within 2.5 $\mu$ m on either side of the profile  
492 ideally representing the average fluorescence in the cytoplasm. These corrected  
493 peaks (junction) intensities were then plotted as scatter-cloud. The intensity values  
494 of each group were normalized to the control unstretched group.

495

496

497

498

499 **ACKNOWLEDGEMENT:**

500

501 VV acknowledges support for the NRF grant NRF-CRP11-2012-02.

502 Work in Australia was supported by the Human Frontiers Science Program  
503 (RGP0023/2014 to S. Grill, Z. Bryant and A. Yap), the National Health and Medical  
504 Research Council of Australia (1037320, 1067405), and the Australian Research  
505 Council (DP150101367). ASY is a Research Fellow of the NHMRC (1044041).

506

507

508

509 **References:**

510

511 <sup>1</sup> N. I. Petridou, Z. Spiro, and C. P. Heisenberg, *Nature cell biology* **19** (6),  
512 581 (2017).

513 <sup>2</sup> V. Vogel and M. Sheetz, *Nature reviews. Molecular cell biology* **7** (4), 265  
514 (2006); Verena Ruprecht, Pascale Monzo, Andrea Ravasio, Zhang  
515 Yue, Ekta Makhija, Pierre Olivier Strale, Nils Gauthier, G. V. Shivashankar,  
516 Vincent Studer, Corinne Albiges-Rizo, and Virgile Viasnoff, *Journal of Cell*  
517 *Science* **130** (1), 51 (2017).

518 <sup>3</sup> P. Kanchanawong, G. Shtengel, A. M. Pasapera, E. B. Ramko, M. W.  
519 Davidson, H. F. Hess, and C. M. Waterman, *Nature* **468** (7323), 580  
520 (2010); M. Saxena, S. Liu, B. Yang, C. Hajal, R. Changede, J. Hu, H.  
521 Wolfenson, J. Hone, and M. P. Sheetz, *Nature materials* **16** (7), 775  
522 (2017); K. Baumann, *Nat Rev Mol Cell Biol* **11** (10), 679 (2010).

523 <sup>4</sup> C. H. Streuli, *J Cell Sci* **122** (Pt 2), 171 (2009); A. J. Engler, S. Sen, H. L.  
524 Sweeney, and D. E. Discher, *Cell* **126** (4), 677 (2006).

525 <sup>5</sup> A. Ganz, M. Lambert, A. Saez, P. Silberzan, A. Buguin, R. M. Mege, and B.  
526 Ladoux, *Biol. Cell.* **98** (12), 721 (2006); B. Ladoux, E. Anon, M. Lambert,  
527 A. Rabodzey, P. Hersen, A. Buguin, P. Silberzan, and R. M. Mege,  
528 *Biophysical journal* **98** (4), 534 (2010).

529 <sup>6</sup> E. Bazellieres, V. Conte, A. Elosegui-Artola, X. Serra-Picamal, M. Bintanel-  
530 Morcillo, P. Roca-Cusachs, J. J. Munoz, M. Sales-Pardo, R. Guimera, and X.  
531 Trepas, *Nature cell biology* **17** (4), 409 (2015); I. Muhamed, J. Wu, P.  
532 Sehgal, X. Kong, A. Tajik, N. Wang, and D. E. Leckband, *Journal of cell*  
533 *science* **129** (9), 1843 (2016); F. Twiss, Q. Le Duc, S. Van Der Horst,  
534 H. Tabdili, G. Van Der Krogt, N. Wang, H. Rehmann, S. Huveneers, D. E.  
535 Leckband, and J. De Rooij, *Biology open* **1** (11), 1128 (2012).

536 <sup>7</sup> W. A. Thomas, C. Boscher, Y. S. Chu, D. Cuvelier, C. Martinez-Rico, R.  
537 Seddiki, J. Heysch, B. Ladoux, J. P. Thiery, R. M. Mege, and S. Dufour, *The*  
538 *Journal of biological chemistry* **288** (7), 4957 (2013).

539 <sup>8</sup> Z. Liu, J. L. Tan, D. M. Cohen, M. T. Yang, N. J. Sniadecki, S. A. Ruiz, C. M.  
540 Nelson, and C. S. Chen, *Proceedings of the National Academy of Sciences*  
541 *of the United States of America* **107** (22), 9944 (2010); V.  
542 Maruthamuthu, B. Sabass, U. S. Schwarz, and M. L. Gardel, *Proceedings of*  
543 *the National Academy of Sciences of the United States of America* **108**  
544 (12), 4708 (2011).

545 <sup>9</sup> K. Bambardekar, R. Clement, O. Blanc, C. Chardes, and P. F. Lenne,  
546 *Proceedings of the National Academy of Sciences of the United States of*  
547 *America* **112** (5), 1416 (2015); A. S. Kris, R. D. Kamm, and A. L.  
548 Sieminski, *Biochem. Biophys. Res. Commun.* **375** (1), 134 (2008).

549 10 M. Benoit and H. E. Gaub, *Cells Tissues Organs* **172** (3), 174 (2002); J.  
550 Kashef and C. M. Franz, *Developmental biology* **401** (1), 165 (2015).  
551 11 J. L. Maitre, H. Berthoumieux, S. F. Krens, G. Salbreux, F. Julicher, E. Paluch,  
552 and C. P. Heisenberg, *Science* **338** (6104), 253 (2012).  
553 12 Y. S. Chu, S. Dufour, J. P. Thiery, E. Perez, and F. Pincet, *Physical review*  
554 *letters* **94** (2), 028102 (2005).  
555 13 Y. S. Chu, W. A. Thomas, O. Eder, F. Pincet, E. Perez, J. P. Thiery, and S.  
556 Dufour, *The Journal of cell biology* **167** (6), 1183 (2004).  
557 14 B. Ladoux, W. J. Nelson, J. Yan, and R. M. Mege, *Integrative biology :*  
558 *quantitative biosciences from nano to macro* (2015).  
559 15 W. Engl, B. Arasi, L. L. Yap, J. P. Thiery, and V. Viasnoff, *Nature cell biology*  
560 **16** (6), 587 (2014).  
561 16 A. G. Howarth, K. L. Singer, and B. R. Stevenson, *J. Membr. Biol.* **137** (3),  
562 261 (1994).  
563 17 S. Yonemura, Y. Wada, T. Watanabe, A. Nagafuchi, and M. Shibata, *Nature*  
564 *cell biology* **12** (6), 533 (2010); M. Yao, W. Qiu, R. Liu, A. K. Efremov, P.  
565 Cong, R. Seddiki, M. Payre, C. T. Lim, B. Ladoux, R. M. Mege, and J. Yan,  
566 *Nature communications* **5**, 4525 (2014).  
567 18 J. M. Leerberg, G. A. Gomez, S. Verma, E. J. Moussa, S. K. Wu, R. Priya, B. D.  
568 Hoffman, C. Grashoff, M. A. Schwartz, and A. S. Yap, *Current biology : CB*  
569 **24** (15), 1689 (2014); F. Twiss and J. de Rooij, *Cell. Mol. Life Sci.* **70**  
570 (21), 4101 (2013); H. J. Choi, S. Pokutta, G. W. Cadwell, A. A. Bobkov, L.  
571 A. Bankston, R. C. Liddington, and W. I. Weis, *Proceedings of the National*  
572 *Academy of Sciences of the United States of America* **109** (22), 8576  
573 (2012).  
574 19 E. M. Kovacs, S. Verma, R. G. Ali, A. Ratheesh, N. A. Hamilton, A.  
575 Akhmanova, and A. S. Yap, *Nature cell biology* **13** (8), 934 (2011).  
576 20 C. Odaka, M. L. Sanders, and P. Crews, *Clin. Diagn. Lab. Immunol.* **7** (6),  
577 947 (2000).  
578 21 S. K. Wu, S. Budnar, A. S. Yap, and G. A. Gomez, *Eur. J. Cell Biol.* **93** (10-12),  
579 396 (2014).  
580 22 Domenica Spadaro, Shimin Le, Thierry Laroche, Isabelle Mean, Lionel  
581 Jond, Jie Yan, and Sandra Citi, *Current Biology*, **24**, 1-13 (2017).  
582 23 K. Hayakawa, H. Tatsumi, and M. Sokabe, *The Journal of cell biology* **195**  
583 (5), 721 (2011).  
584  
585

586 **FIGURES**

587

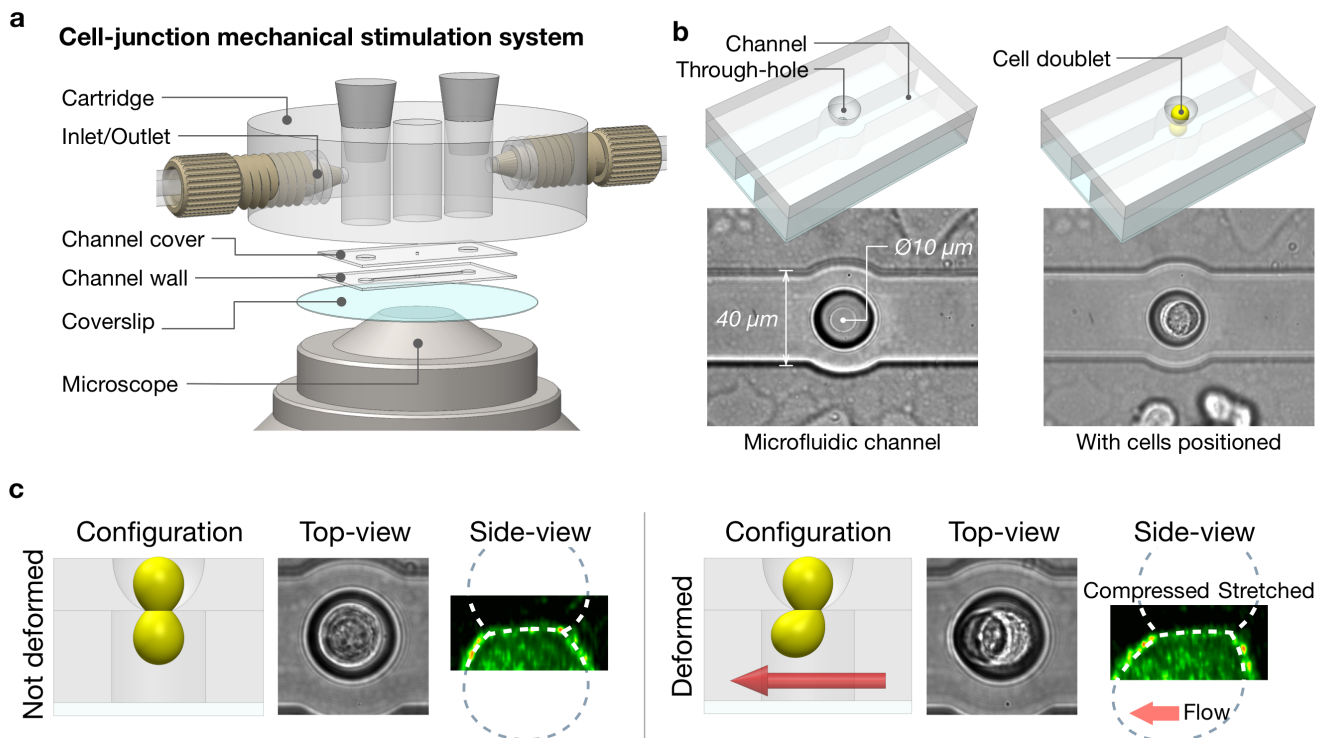

589 **Figure 1: Principles of the single cell junction mechanical stretcher.**

590 (a). Exploded view of the junction stretcher assembly design. The device was  
591 mounted onto a stage adaptor for confocal microscope (Nikon 60X WI). (b). It  
592 comprises of an upper chamber communicating vertically with a channel via a  
593 cup shaped through-hole. A single cell doublet can be positioned across this  
594 through-hole, with its junction right at the aperture. (c). A flow in the channel  
595 shears the bottom cell whereas the top cell is kept still. As a result, it induces a  
596 localised mechanical stress at the junction. This can be imaged with a spinning  
597 disc microscope at high resolution. Plasma membrane marker was used here to  
598 visualise the cell geometry.  
599



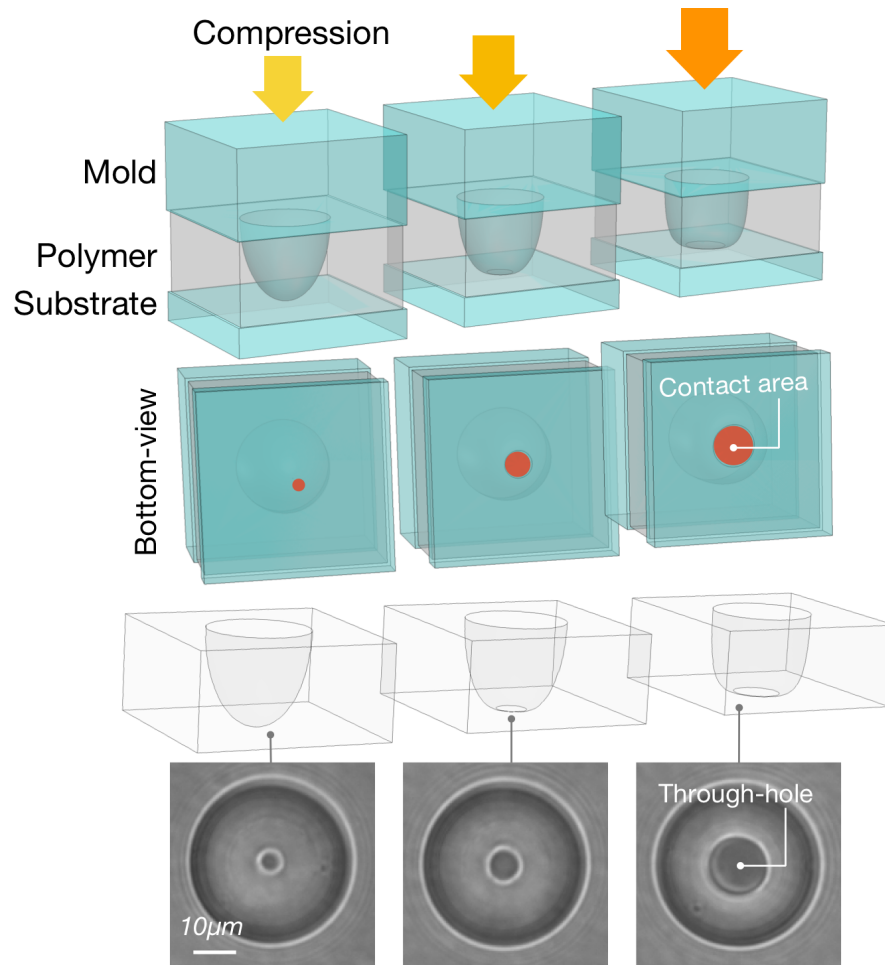

600

601 **Figure 2: Through-hole size customization for channel cover layer.**

602 The dome-shape PDMS mold was pressed against a flat PDMS substrate with a  
603 precision pressor. After polymer capillary-filling, the through-hole size is  
604 defined by clearing out the polymer from the center of the dome-shape pillar  
605 mold under compression. The polymer is then cured to finalize the through-  
606 hole geometry. Such method enables us to make through-hole size from  $\text{Ø}5\mu\text{m}$   
607 to  $\text{Ø}22\mu\text{m}$ , but it is kept at  $\text{Ø}10\mu\text{m}$  to match the average junction size of S180  
608 cell doublets.

609

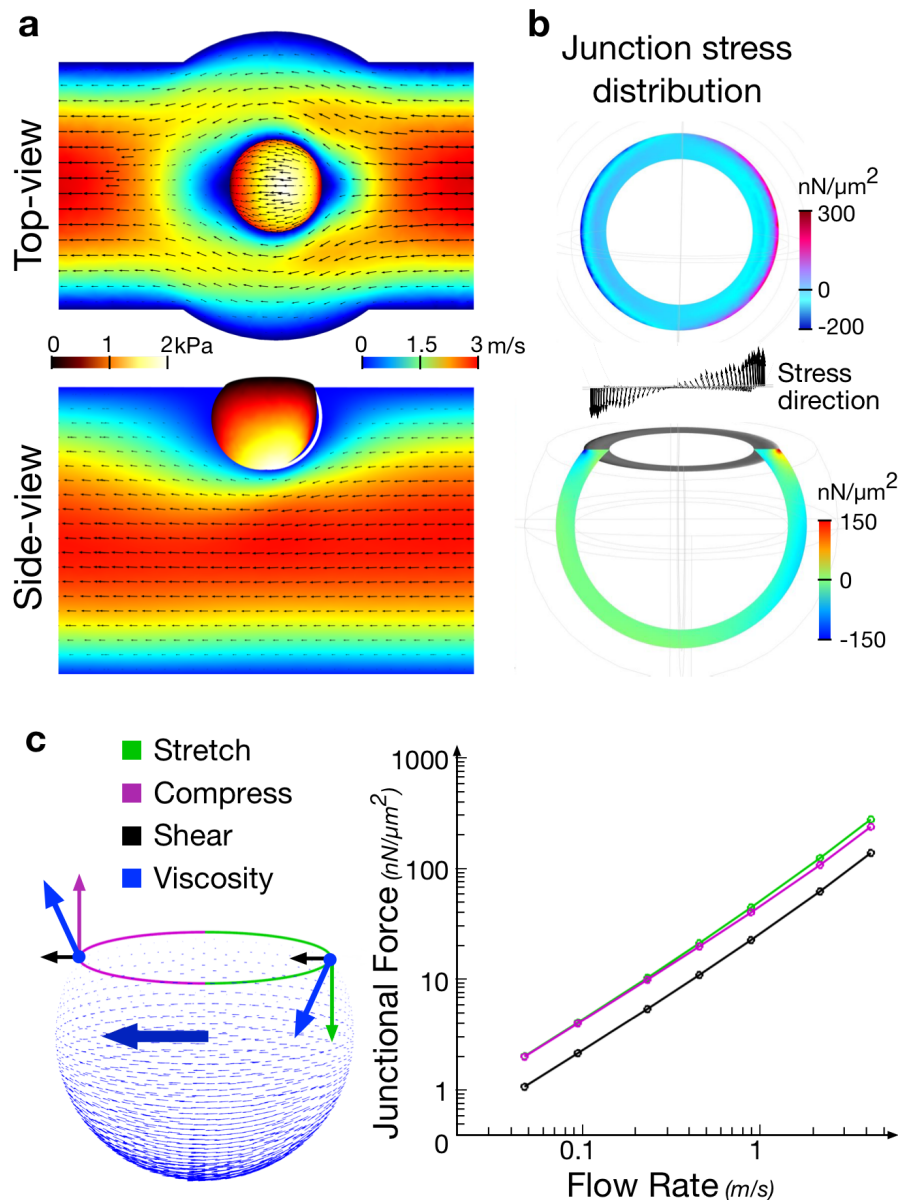

610  
611  
612  
613  
614  
615  
616  
617  
618  
619

**Figure 3: FE simulation of flow-induced junctional stress.**

(a). Flow velocity field in the channel and the resultant stress distribution over the cell surface. Cell size  $\text{\O}15\mu\text{m}$ , contact size  $\text{\O}10\mu\text{m}$ , channel width  $40\mu\text{m}$  height  $50\mu\text{m}$ . (b). Flow-induced stress is concentrated along the junction ring, rather than on the cell body. (c). Viscosity drag force, when transduced onto the junction, was decomposed into horizontal shear force and vertical compression or stretching forces. The stretching/compression force are estimated to be twice as strong as the shearing force.

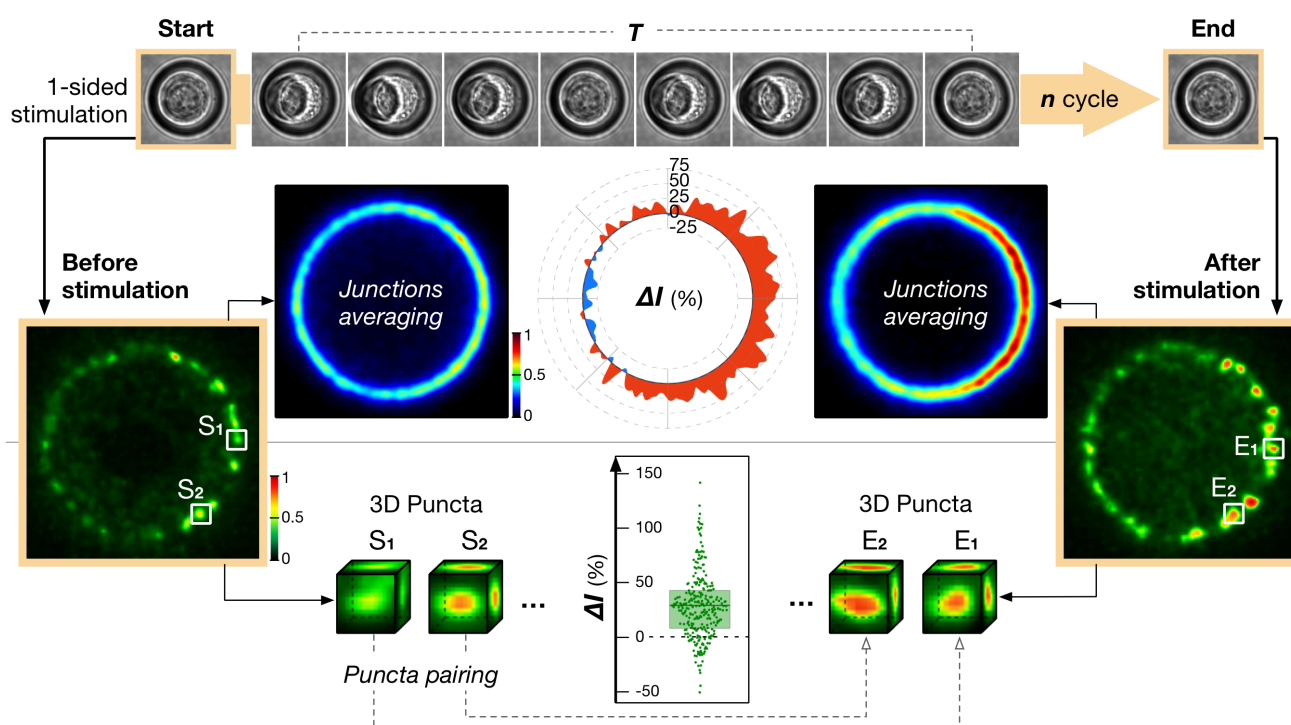

621 **Figure 4: Image acquisition and analysis schemes for single junction**  
 622 **stimulation.**

623 We used 1-sided (asymmetric) 1Hz oscillatory flow cycles to mechanically  
 624 stimulate the junction. The cell-cell contact is only imaged at rest position  
 625 before and after a predefined number of stimulation cycles. The stereotypical  
 626 shape of the junction ring allows us to average the protein distribution (e.g. E-  
 627 cadherin as shown here) over many junctions as to generate a map of the  
 628 mechanically induced fold recruitment of proteins. Alternatively, the effect of  
 629 mechanical stimulation on the recruitment of different proteins at the junction  
 630 can be more precisely quantified by calculating their intensity change ( $\Delta I$ ) in a  
 631 series of  $1\mu\text{m}^3$  cubic volumes based on E-cadherin cluster positions.  $S_n$  denotes  
 632 the protein intensity in the volume defined by a E-cadherin cluster location  
 633 before stimulation;  $E_n$  denotes the protein intensity in the same volume after  
 634 the stimulation.  
 635

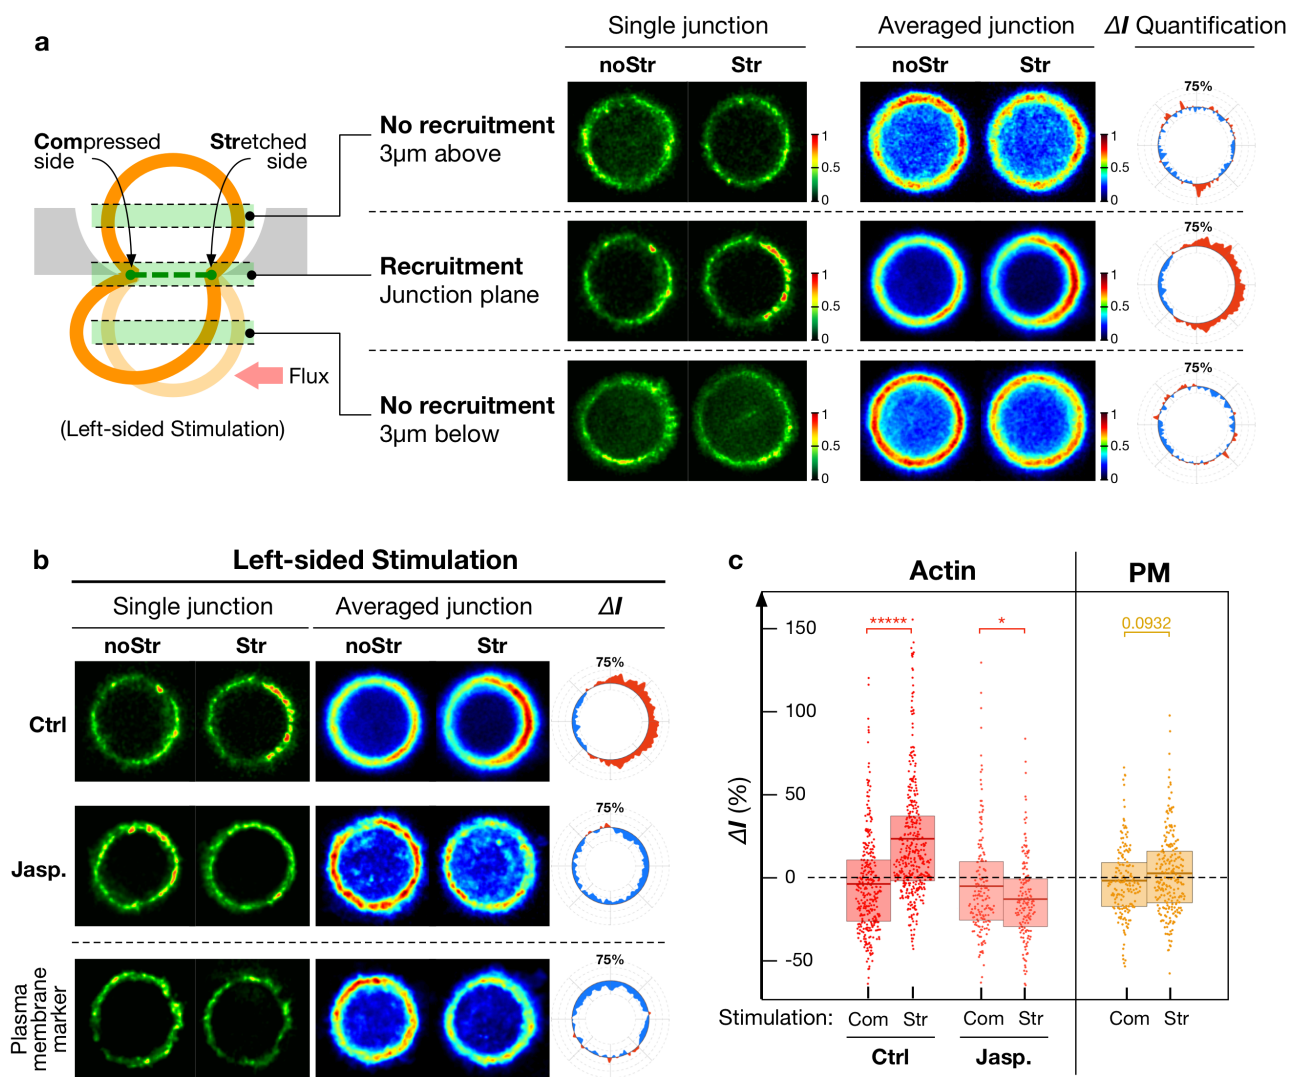

637 **Figure 5: Actin recruitment upon junction mechanical stimulation**  
638 (a). Optical sections (1 $\mu$ m in thickness) imaged at the cell-cell contact, or 3  
639  $\mu$ m above and below the contact plane. Actin was selectively recruited at the  
640 stretched part of the junction after 2-min stimulation as shown in  
641 representative junction and averaged response (n=30 junctions). Images were  
642 normalized separately as noStr vs. Str pairs for different focal planar  
643 locations. (b). Optical sections of actin recruitment at the junction for a 2-  
644 min 1-sided stimulation that display a biased increase (n=30 junctions) of  
645 actin towards the stretched side of the contact. A treatment with  
646 Jasplakinolide (100nM) abolishes the recruitment (n=9 junctions). The  
647 absence of recruitment of plasma membrane marker (PM-mApple) serves as  
648 control (n=20 junctions). Paired imaged (noStr and Str) were normalized  
649 from 0 to 1. (c). Punctate analysis of actin recruitment along the junction for  
650 2-min 1-sided (n=200-350 puncta) stimulation with and without  
651 Jasplakinolide treatment (100nM). Plasma membrane marker serves as a  
652 control (n=200-250 puncta). Values are adjusted for photo-bleaching,  
653 therefore did not fully exhibit the decrease in signal as seen from the images.  
654 Com: Compressed side; Str: stretched side; noStr: no stimulation case.  
655 Statistics has been performed via two-sample t-test with \* for p<0.05, \*\* for  
656 p<1x10<sup>-2</sup>, \*\*\* for p<1x10<sup>-3</sup>, \*\*\*\* for p<1x10<sup>-4</sup>, \*\*\*\*\* for p<1x10<sup>-5</sup>. Mean,  
657 25th and 75th percentiles are indicated as boxed bar.

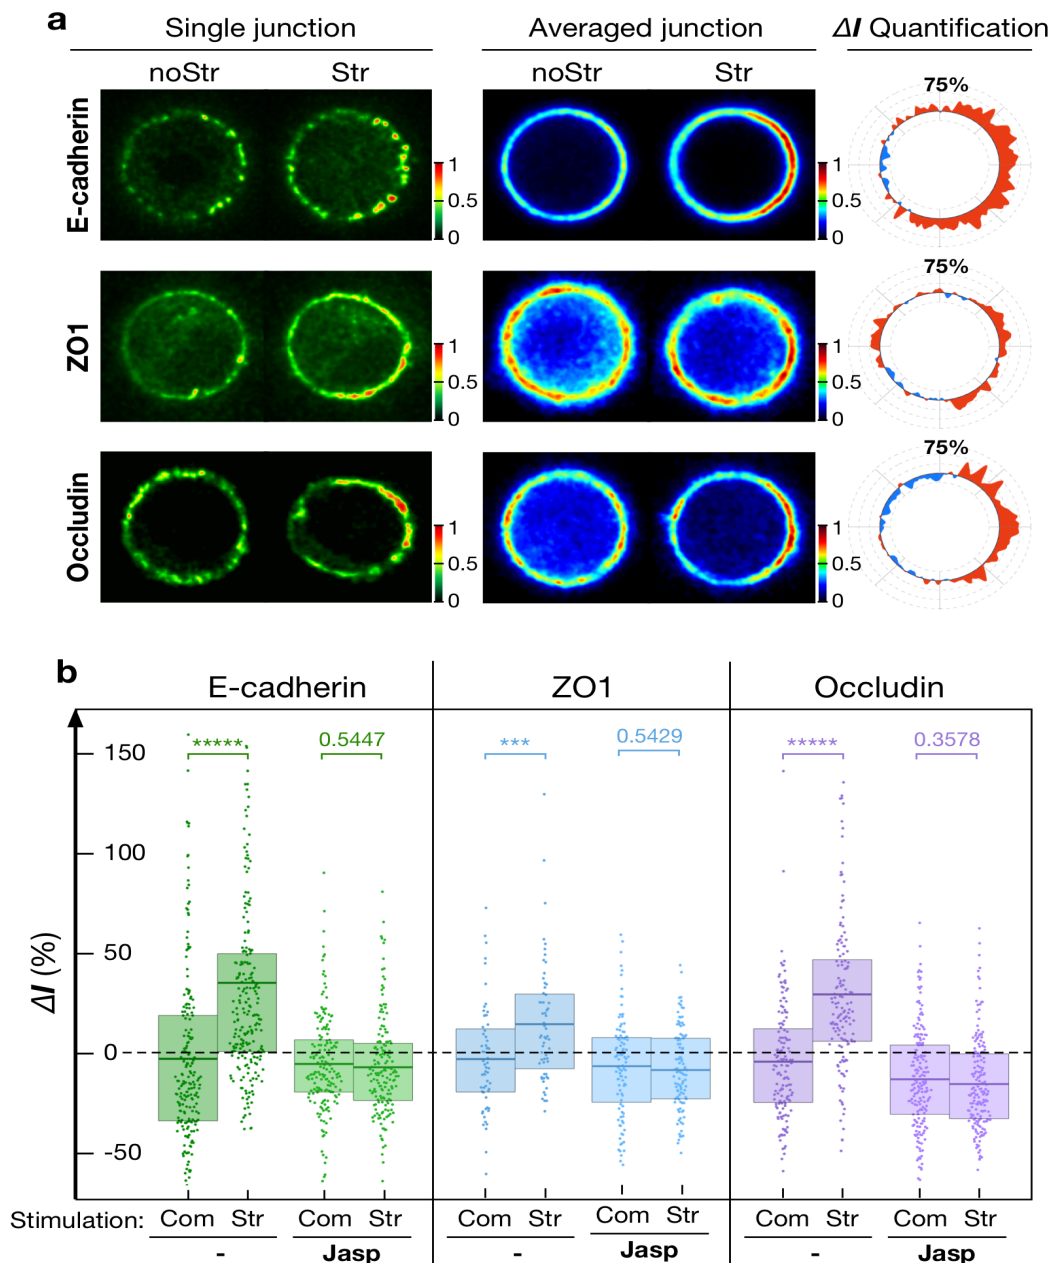

658

659

660

661

662

663

664

665

666

667

668

669

670

671

672

673

**Figure 6: Junctional proteins recruitment upon mechanical stimulation**

(a). Representative and averaged images of E-cadherin (n=20 junctions), ZO-1 (n=8 junctions) and Occludin (n=11 junctions) images for a 10-minute 1-sided stimulation. Paired imaged (noStr and Str) were normalized from 0 to 1. (b). Punctate analysis ( $\Delta I$ : relative recruitment in %) of E-cadherin (n=250-450 puncta), ZO-1 (n=100-250 puncta), and Occludin (n=150-250 puncta) upon 10-minute 1-sided stimulation. Only the stretched junction side showed reinforcement (E-cadherin by  $34.3 \pm 4.0\%$ s.e.m., ZO-1 by  $14.6 \pm 3.9\%$ s.e.m., and Occludin by  $28.5 \pm 3.4\%$ s.e.m. Adjusted for photo-bleaching. Such effect is however abolished in the presence of Jasplakinolide. Com: Compressed side; Str: stretched side; noStr: no stimulation case. Statistics has been performed via two-sample t-test with \* for  $p < 0.05$ , \*\* for  $p < 1 \times 10^{-2}$ , \*\*\* for  $p < 1 \times 10^{-3}$ , \*\*\*\* for  $p < 1 \times 10^{-4}$ , \*\*\*\*\* for  $p < 1 \times 10^{-5}$ . Mean, 25th and 75th percentiles are indicated as boxed bar.

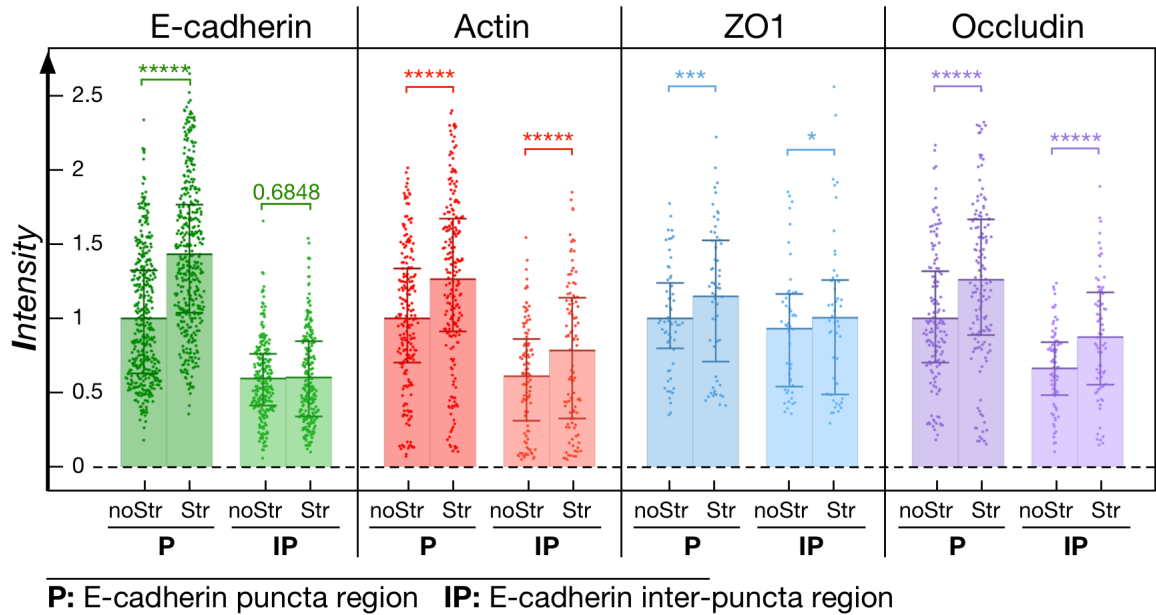

674

675

**Figure 7.**

676 Intensities of E-cadherin, actin, ZO-1 and occludin under cadherin puncta (P)

677 (n=60-200 puncta) or in the space of in-between puncta region (IP) (n=50-

678 100 regions) in the stretched (10min stimulation) and non-stretched cases.

679 Note i- the general reduction of all protein levels at regions in between puncta,

680 compared to puncta region; ii- the absence of stretch-induced recruitment of E-

681 cadherin at its in-between puncta regions; iii- the persistence of stretch-

682 induced recruitment of the other proteins at in-between E-cadherin puncta

683 regions. noStr: no stimulation case; Str: stretched case. Statistics has been

684 performed via two-sample t-test with \* for  $p < 0.05$ , \*\* for  $p < 1 \times 10^{-2}$ , \*\*\* for

685  $p < 1 \times 10^{-3}$ , \*\*\*\* for  $p < 1 \times 10^{-4}$ , \*\*\*\*\* for  $p < 1 \times 10^{-5}$ . Mean, 25th and 75th

686 percentiles are indicated on the bar.

687

688

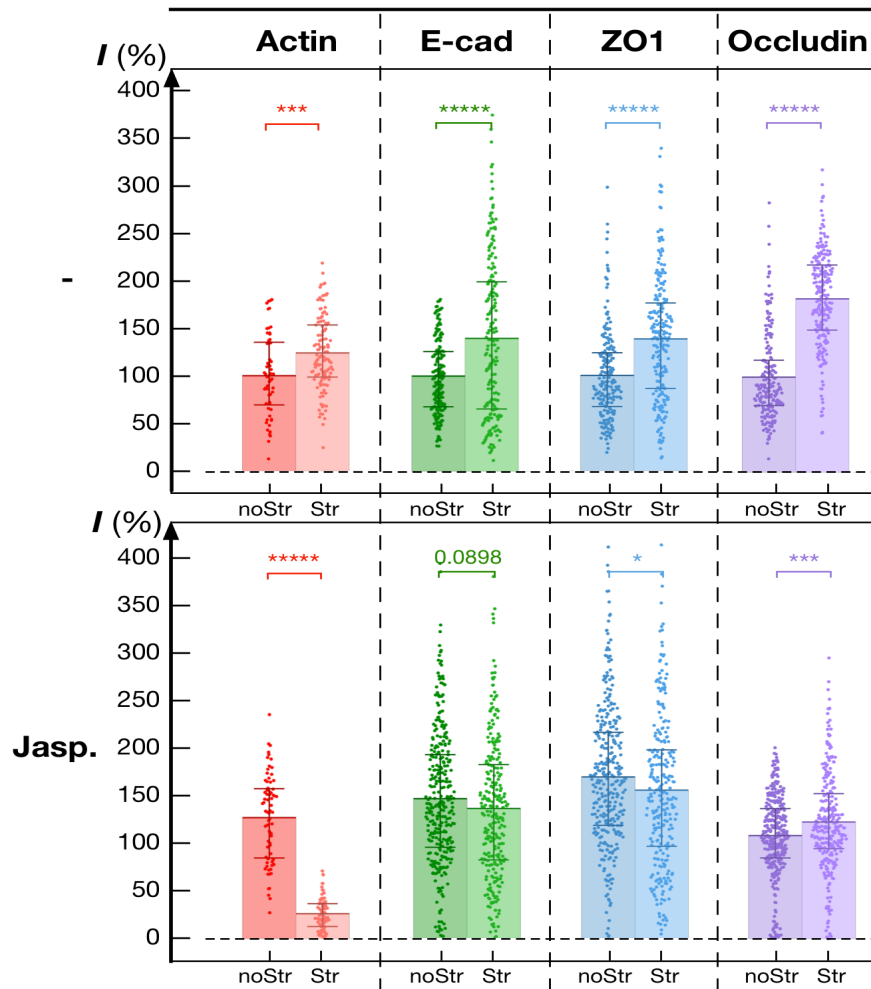

689  
690  
691  
692  
693  
694  
695  
696  
697  
698  
699  
700  
701

**Figure 7: Mechanosensitive junctional response in monolayer.**

Effect of equiaxial stretching on the recruitment of proteins at cell junctions in Caco-2 monolayer (n=60-200 junctions for actin, n=70-300 junctions for E-cadherin, ZO-1 and Occludin). The monolayer was stretched on a commercial biaxial stretcher (Flexcell™) for 5 minutes at 10% constant strain. Control case (Ctrl), Jasplakinolide treatment (100nM, 60min) (Jasp.). Quantifications of junction intensity are based on linescan analysis (normalized to the No Stretch & Control condition). Str: stretched case; noStr: no stimulation case. Statistics has been performed via two-sample t-test with \* for  $p < 0.05$ , \*\* for  $p < 1 \times 10^{-2}$ , \*\*\* for  $p < 1 \times 10^{-3}$ , \*\*\*\* for  $p < 1 \times 10^{-4}$ , \*\*\*\*\* for  $p < 1 \times 10^{-5}$ . Mean, 25th and 75th percentiles are indicated on the bar.
